# Supplementary material for: Effect of Hepatocellular Carcinoma Surveillance Programmes on Overall Survival in a Mixed Cirrhotic UK Population: A Prospective, Longitudinal Cohort Study
Source: MDPI journal article supplement (doi:10.3390/jcm10132770), 2021-06-24
Supplement: s1 [file s1]

**Table S1.** – Characteristics by Centre.

|                                             | Total N     | Missing N | levels          | Adherent<br>to<br>surveillanc<br>e -<br>Edinburgh | Adherent<br>to<br>surveillanc<br>e -<br>Glasgow | No<br>surveillanc<br>e -<br>Edinburgh | No<br>surveillanc<br>e -<br>Glasgow | Not<br>adherent to<br>surveillanc<br>e -<br>Edinburgh | Not<br>adherent to<br>surveillanc<br>e -<br>Glasgow | p-value |
|---------------------------------------------|-------------|-----------|-----------------|---------------------------------------------------|-------------------------------------------------|---------------------------------------|-------------------------------------|-------------------------------------------------------|-----------------------------------------------------|---------|
| Total N (%)                                 |             |           |                 | 142 (14.4)                                        | 160 (16.2)                                      | 167 (17.0)                            | 424 (43.0)                          | 38 (3.9)                                              | 54 (5.5)                                            |         |
| Age at<br>diagnosis                         | 985 (100.0) | 0         | Mean (SD)       | 64.5 (8.4)                                        | 64.0 (10.7)                                     | 70.4 (12.9)                           | 71.0 (10.7)                         | 65.2 (9.4)                                            | 67.6 (9.5)                                          | <0.001  |
| Sex                                         | 985 (100.0) | 0         | Female          | 38 (26.8)                                         | 30 (18.8)                                       | 32 (19.2)                             | 74 (17.5)                           | 13 (34.2)                                             | 9 (16.7)                                            | 0.047   |
|                                             |             |           | Male            | 104 (73.2)                                        | 130 (81.2)                                      | 135 (80.8)                            | 350 (82.5)                          | 25 (65.8)                                             | 45 (83.3)                                           |         |
| Year of<br>diagnosis                        | 985 (100.0) | 0         | Mean (SD)       | 2012.3 (1.9)                                      | 2013.0 (1.9)                                    | 2012.1 (1.7)                          | 2012.3 (2.0)                        | 2011.0 (1.5)                                          | 2013.5 (1.4)                                        | <0.001  |
| Child Pugh<br>Stage                         | 985 (100.0) | 0         | No<br>Cirrhosis | 0 (0.0)                                           | 10 (6.2)                                        | 16 (9.6)                              | 126 (29.7)                          | 0 (0.0)                                               | 5 (9.3)                                             | <0.001  |
|                                             |             |           | A               | 67 (47.2)                                         | 83 (51.9)                                       | 69 (41.3)                             | 100 (23.6)                          | 15 (39.5)                                             | 17 (31.5)                                           |         |
|                                             |             |           | B               | 64 (45.1)                                         | 50 (31.2)                                       | 72 (43.1)                             | 137 (32.3)                          | 22 (57.9)                                             | 24 (44.4)                                           |         |
|                                             |             |           | C               | 11 (7.7)                                          | 17 (10.6)                                       | 10 (6.0)                              | 61 (14.4)                           | 1 (2.6)                                               | 8 (14.8)                                            |         |
| Alcoholic<br>Liver<br>Disease               | 985 (100.0) | 0         | No              | 75 (52.8)                                         | 67 (41.9)                                       | 118 (70.7)                            | 213 (50.2)                          | 20 (52.6)                                             | 20 (37.0)                                           | <0.001  |
|                                             |             |           | Yes             | 67 (47.2)                                         | 93 (58.1)                                       | 49 (29.3)                             | 211 (49.8)                          | 18 (47.4)                                             | 34 (63.0)                                           |         |
| Viral<br>hepatitis                          | 985 (100.0) | 0         | No              | 88 (62.0)                                         | 106 (66.2)                                      | 143 (85.6)                            | 370 (87.3)                          | 25 (65.8)                                             | 43 (79.6)                                           | <0.001  |
|                                             |             |           | Yes             | 54 (38.0)                                         | 54 (33.8)                                       | 24 (14.4)                             | 54 (12.7)                           | 13 (34.2)                                             | 11 (20.4)                                           |         |
| Non-<br>alcoholic<br>fatty liver<br>disease | 985 (100.0) | 0         | No              | 111 (78.2)                                        | 125 (78.1)                                      | 83 (49.7)                             | 364 (85.8)                          | 28 (73.7)                                             | 41 (75.9)                                           | <0.001  |
|                                             |             |           | Yes             | 31 (21.8)                                         | 35 (21.9)                                       | 84 (50.3)                             | 60 (14.2)                           | 10 (26.3)                                             | 13 (24.1)                                           |         |
| Other                                       | 985 (100.0) | 0         | No              | 120 (84.5)                                        | 130 (81.2)                                      | 137 (82.0)                            | 250 (59.0)                          | 32 (84.2)                                             | 37 (68.5)                                           | <0.001  |
|                                             |             |           | Yes             | 22 (15.5)                                         | 30 (18.8)                                       | 30 (18.0)                             | 174 (41.0)                          | 6 (15.8)                                              | 17 (31.5)                                           |         |

All tests are Chi-square, except when denoted by † where Kruskal-Wallis tests used. SD – Standard Deviation.

**Table S2.** – Stage of disease by centre and surveillance adherence.

|                               | Total N | Missing N |                    | Adherent<br>to<br>surveillanc<br>e -<br>Edinburgh | Adherent<br>to<br>surveillanc<br>e -<br>Glasgow | No<br>surveillanc<br>e -<br>Edinburgh | No<br>surveillanc<br>e -<br>Glasgow | Not<br>adherent to<br>surveillanc<br>e -<br>Edinburgh | Not<br>adherent to<br>surveillanc<br>e -<br>Glasgow | p-value |
|-------------------------------|---------|-----------|--------------------|---------------------------------------------------|-------------------------------------------------|---------------------------------------|-------------------------------------|-------------------------------------------------------|-----------------------------------------------------|---------|
| Total N (%)                   |         |           |                    | 142 (14.4)                                        | 160 (16.2)                                      | 167 (17.0)                            | 424 (43.0)                          | 38 (3.9)                                              | 54 (5.5)                                            |         |
| BCLC Stage<br>at<br>diagnosis | 985     | 0         | 0/A                | 98 (69.0)                                         | 61 (38.1)                                       | 39 (23.4)                             | 39 (9.2)                            | 6 (15.8)                                              | 9 (16.7)                                            | <0.001  |
|                               |         |           | B                  | 35 (24.6)                                         | 33 (20.6)                                       | 32 (19.2)                             | 96 (22.6)                           | 16 (42.1)                                             | 15 (27.8)                                           |         |
|                               |         |           | C                  | 7 (4.9)                                           | 45 (28.1)                                       | 60 (35.9)                             | 174 (41.0)                          | 11 (28.9)                                             | 17 (31.5)                                           |         |
|                               |         |           | D                  | 2 (1.4)                                           | 21 (13.1)                                       | 36 (21.6)                             | 115 (27.1)                          | 5 (13.2)                                              | 13 (24.1)                                           |         |
| AFP level                     | 941     | 44        | <100               | 117 (82.4)                                        | 124 (77.5)                                      | 73 (43.7)                             | 226 (53.3)                          | 21 (55.3)                                             | 40 (74.1)                                           | <0.001  |
|                               |         |           | >1000              | 4 (2.8)                                           | 12 (7.5)                                        | 34 (20.4)                             | 131 (30.9)                          | 8 (21.1)                                              | 8 (14.8)                                            |         |
|                               |         |           | 100–1000           | 17 (12.0)                                         | 24 (15.0)                                       | 25 (15.0)                             | 62 (14.6)                           | 4 (10.5)                                              | 6 (11.1)                                            |         |
|                               |         |           | Not known          | 0 (0.0)                                           | 0 (0.0)                                         | 0 (0.0)                               | 5 (1.2)                             | 0 (0.0)                                               | 0 (0.0)                                             |         |
|                               |         |           | (Missing)          | 4 (2.8)                                           | 0 (0.0)                                         | 35 (21.0)                             | 0 (0.0)                             | 5 (13.2)                                              | 0 (0.0)                                             |         |
| Treatment                     | 983     | 2         | Liver<br>resection | 7 (4.9)                                           | 17 (10.6)                                       | 23 (13.8)                             | 13 (3.1)                            | 1 (2.6)                                               | 3 (5.6)                                             | <0.001  |

|                  | Total N | Missing N |                      | Adherent to surveillance e - Edinburgh | Adherent to surveillance e - Glasgow | No surveillance e - Edinburgh | No surveillance e - Glasgow | Not adherent to surveillance e - Edinburgh | Not adherent to surveillance e - Glasgow | p-value |
|------------------|---------|-----------|----------------------|----------------------------------------|--------------------------------------|-------------------------------|-----------------------------|--------------------------------------------|------------------------------------------|---------|
| Treatment type   | 983     | 2         | Liver transplant     | 31 (21.8)                              | 14 (8.8)                             | 1 (0.6)                       | 7 (1.7)                     | 3 (7.9)                                    | 0 (0.0)                                  | <0.001  |
|                  |         |           | Ablative therapies   | 22 (15.5)                              | 21 (13.1)                            | 8 (4.8)                       | 12 (2.8)                    | 4 (10.5)                                   | 5 (9.3)                                  |         |
|                  |         |           | Sorafenib            | 3 (2.1)                                | 4 (2.5)                              | 4 (2.4)                       | 18 (4.2)                    | 0 (0.0)                                    | 2 (3.7)                                  |         |
|                  |         |           | Supportive care only | 31 (21.8)                              | 54 (33.8)                            | 91 (54.5)                     | 291 (68.6)                  | 16 (42.1)                                  | 31 (57.4)                                |         |
|                  |         |           | TACE                 | 47 (33.1)                              | 50 (31.2)                            | 39 (23.4)                     | 83 (19.6)                   | 14 (36.8)                                  | 13 (24.1)                                |         |
|                  |         |           | (Missing)            | 1 (0.7)                                | 0 (0.0)                              | 1 (0.6)                       | 0 (0.0)                     | 0 (0.0)                                    | 0 (0.0)                                  |         |
|                  |         |           | Curative therapy     | 60 (42.3)                              | 52 (32.5)                            | 32 (19.2)                     | 32 (7.5)                    | 8 (21.1)                                   | 8 (14.8)                                 |         |
|                  |         |           | Palliative therapy   | 50 (35.2)                              | 54 (33.8)                            | 43 (25.7)                     | 101 (23.8)                  | 14 (36.8)                                  | 15 (27.8)                                |         |
| Treatment intent | 983     | 2         | Supportive care only | 31 (21.8)                              | 54 (33.8)                            | 91 (54.5)                     | 291 (68.6)                  | 16 (42.1)                                  | 31 (57.4)                                | <0.001  |
|                  |         |           | (Missing)            | 1 (0.7)                                | 0 (0.0)                              | 1 (0.6)                       | 0 (0.0)                     | 0 (0.0)                                    | 0 (0.0)                                  |         |
|                  |         |           | Curative             | 60 (42.3)                              | 52 (32.5)                            | 32 (19.2)                     | 32 (7.5)                    | 8 (21.1)                                   | 8 (14.8)                                 |         |
|                  |         |           | Palliative           | 81 (57.0)                              | 108 (67.5)                           | 134 (80.2)                    | 392 (92.5)                  | 30 (78.9)                                  | 46 (85.2)                                |         |
|                  |         |           | (Missing)            | 1 (0.7)                                | 0 (0.0)                              | 1 (0.6)                       | 0 (0.0)                     | 0 (0.0)                                    | 0 (0.0)                                  |         |

BCLC – Barcelona Clinic Liver Cancer, SD – Standard Deviation, OR – Odds Ratio. Curative therapies are Surgery and Transplant.

**Table S3.** - Predictors of adherence to surveillance (including centre).

| Dependent: Surveillance Adherence |           | Not adherent to surveillance | Adherent to surveillance | OR (univariable)               | OR (multivariable)             |
|-----------------------------------|-----------|------------------------------|--------------------------|--------------------------------|--------------------------------|
| Age at diagnosis                  | Mean (SD) | 66.6 (9.5)                   | 64.2 (9.7)               | 0.97 (0.95-1.00, $p = 0.042$ ) | 0.98 (0.95-1.01, $p = 0.132$ ) |
| Sex                               | Female    | 22 (24.4)                    | 68 (75.6)                | -                              | -                              |
|                                   | Male      | 70 (23.0)                    | 234 (77.0)               | 1.08 (0.61-1.85, $p = 0.780$ ) | 1.06 (0.57-1.90, $p = 0.857$ ) |
| Alcoholic Liver Disease           | No        | 40 (22.0)                    | 142 (78.0)               | -                              | -                              |
|                                   | Yes       | 52 (24.5)                    | 160 (75.5)               | 0.87 (0.54-1.38, $p = 0.551$ ) | 0.70 (0.38-1.27, $p = 0.240$ ) |
| Viral hepatitis                   | No        | 68 (26.0)                    | 194 (74.0)               | -                              | -                              |
|                                   | Yes       | 24 (18.2)                    | 108 (81.8)               | 1.58 (0.95-2.70, $p = 0.087$ ) | 0.92 (0.45-1.94, $p = 0.832$ ) |
| Non-alcoholic fatty liver disease | No        | 69 (22.6)                    | 236 (77.4)               | -                              | -                              |
|                                   | Yes       | 23 (25.8)                    | 66 (74.2)                | 0.84 (0.49-1.47, $p = 0.528$ ) | 0.77 (0.40-1.51, $p = 0.445$ ) |
| Other                             | No        | 69 (21.6)                    | 250 (78.4)               | -                              | -                              |
|                                   | Yes       | 23 (30.7)                    | 52 (69.3)                | 0.62 (0.36-1.10, $p = 0.098$ ) | 0.57 (0.27-1.18, $p = 0.123$ ) |
| Centre                            | Edinburgh | 38 (21.1)                    | 142 (78.9)               | -                              | -                              |
|                                   | Glasgow   | 54 (25.2)                    | 160 (74.8)               | 0.79 (0.49-1.27, $p = 0.336$ ) | 0.86 (0.52-1.40, $p = 0.540$ ) |

SD – Standard Deviation.

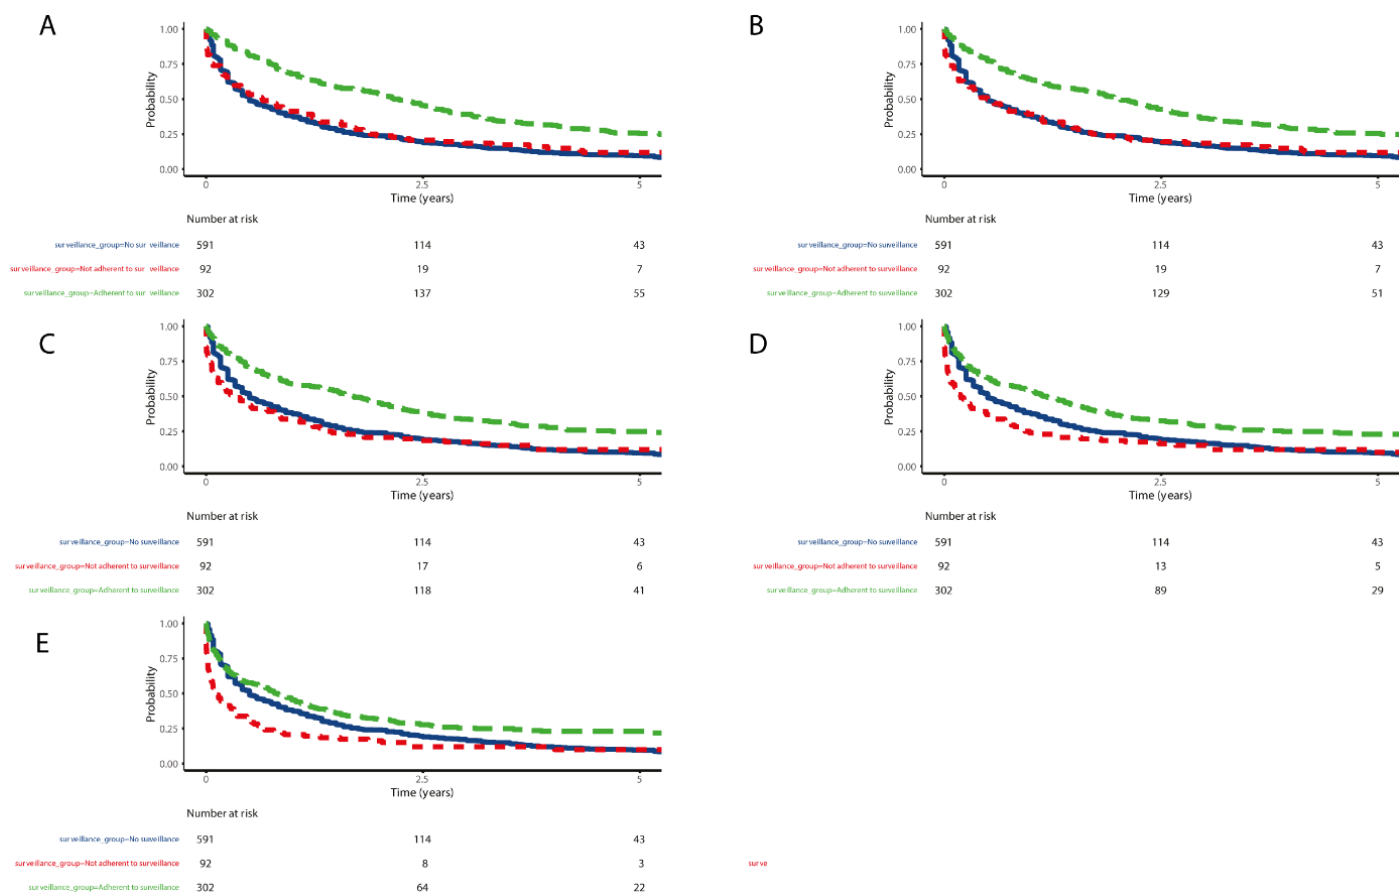

**Figure S1.** Kaplan-Meier for symptom transition method. **A** – 70 days, **B** – 140 days, **C** – 270 days, **D** – 1.57 years, **E** – 2.66 years.

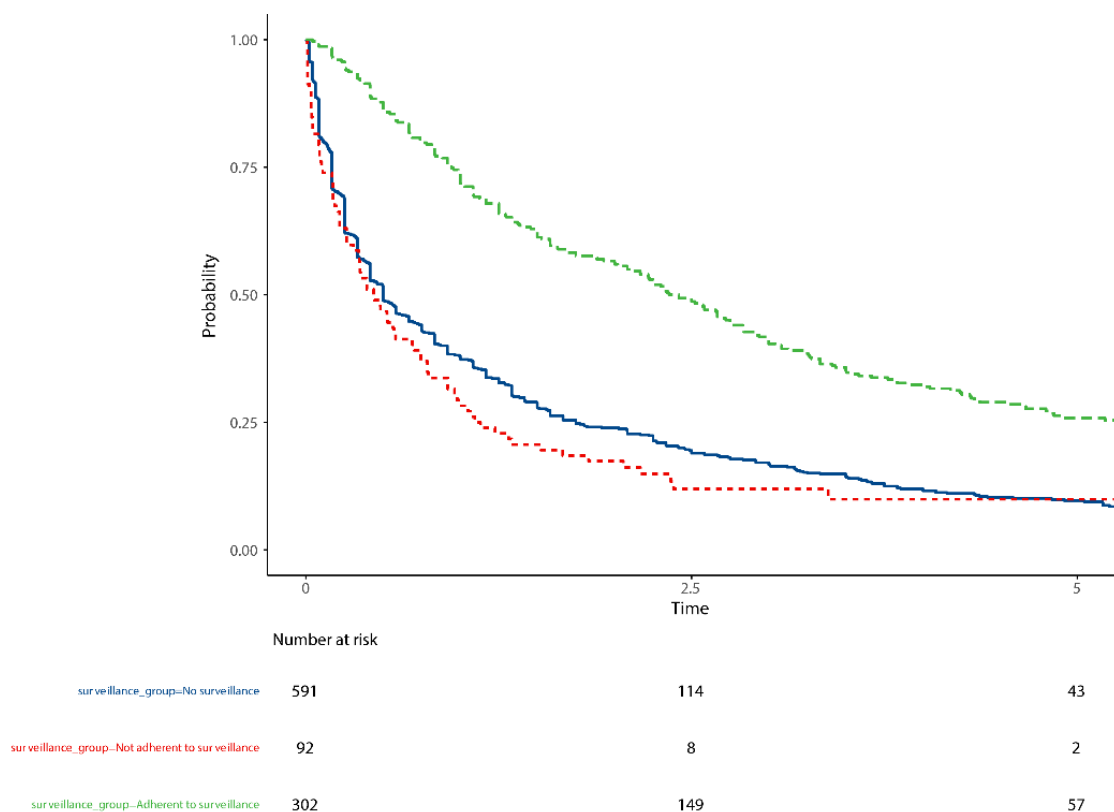

**Figure S2.** – Kaplan-Meier plot by surveillance adherence, with adjustment for counterfactual method.
